# Supplementary material
Source: MDPI journal article supplement (https://www.mdpi.com/2312-7481/10/5/35)
Supplement: s1 [file s1]

# Supplementary Materials

## Novel Hybrid Ferromagnetic Fe–Co/Nanodiamond Nanostructures: Influence of Carbon on Their Structural and Magnetic Properties

Panagiotis G. Ziogas <sup>1</sup>, Athanasios B. Bourlino <sup>1</sup>, Polyxeni Chatzopoulou <sup>2</sup>, George P. Dimitrakopoulos <sup>2</sup>, Anastasios Markou <sup>1</sup> and Alexios P. Douvalis <sup>1,\*</sup>

<sup>1</sup> Physics Department, University of Ioannina, 45110 Ioannina, Greece; p.ziogas@uoi.gr (P.G.Z.); bourlino@uoi.gr (A.B.B.); amarkou@uoi.gr (A.M.); adouval@uoi.gr (A.P.D.)

<sup>2</sup> Physics Department, Aristotle University of Thessaloniki, 54124 Thessaloniki, Greece; pochatzo@physics.auth.gr (P.C.); gdim@auth.gr (G.P.D.)

\* Correspondence: adouval@uoi.gr

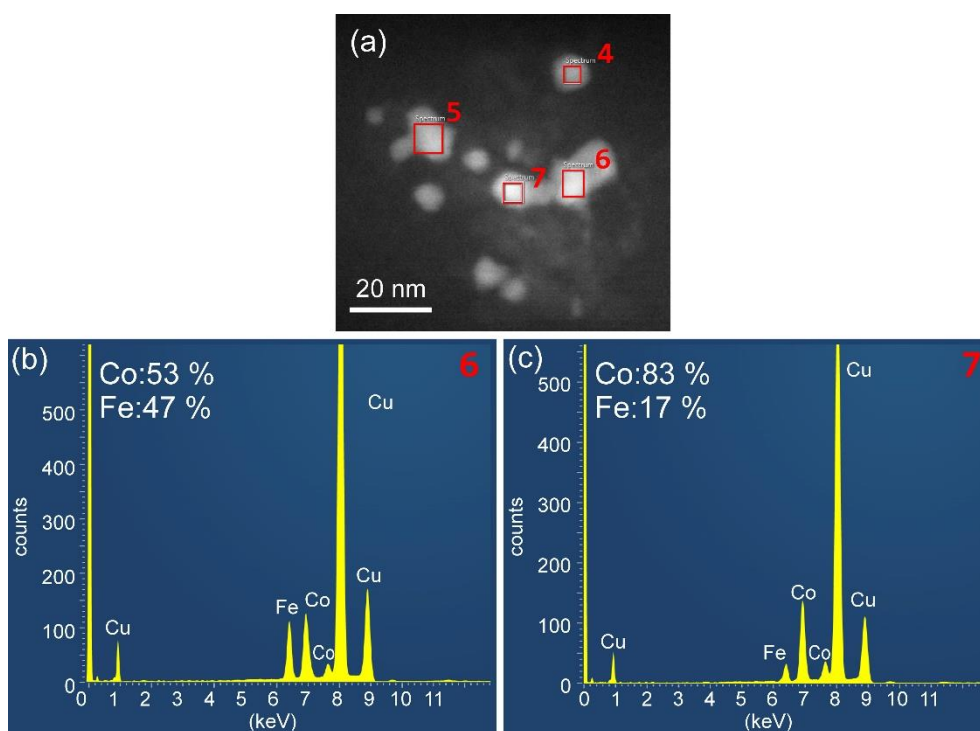

**Figure S1.** (a) HAADF-STEM image from the NHD-700,30m, illustrating some locations where EDS analysis was conducted. Respective values are listed in Table S1. (b,c) spectra #6 and #7 from NPs with high and low Fe-composition respectively (refer to Table S1 for results).

**Table S1.** Fe compositions measured in NHD-700,30m, using EDS analysis on individual Fe-Co NPs.

| Point           | Fe at. %  |
|-----------------|-----------|
| 1               | 32        |
| 2               | 46        |
| 3               | 38        |
| 4               | 44        |
| 5               | 32        |
| 6               | 47        |
| 7               | 17        |
| 8               | 15        |
| 9               | 36        |
| 10              | 39        |
| 11              | 36        |
| 12              | 41        |
| 13              | 37        |
| <b>Average:</b> | <b>35</b> |

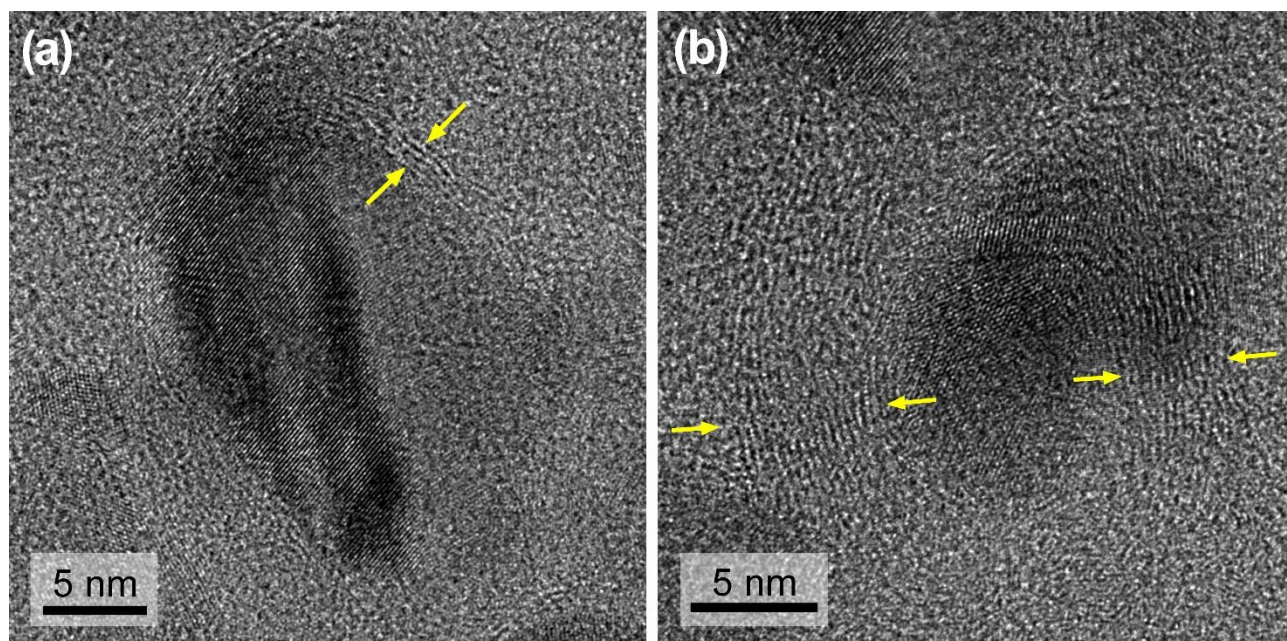

**Figure S2.** HRTEM images obtained from sample NHD-700,30m, showing graphitic-type layers wrapping around the Fe-Co NPs (yellow arrows).

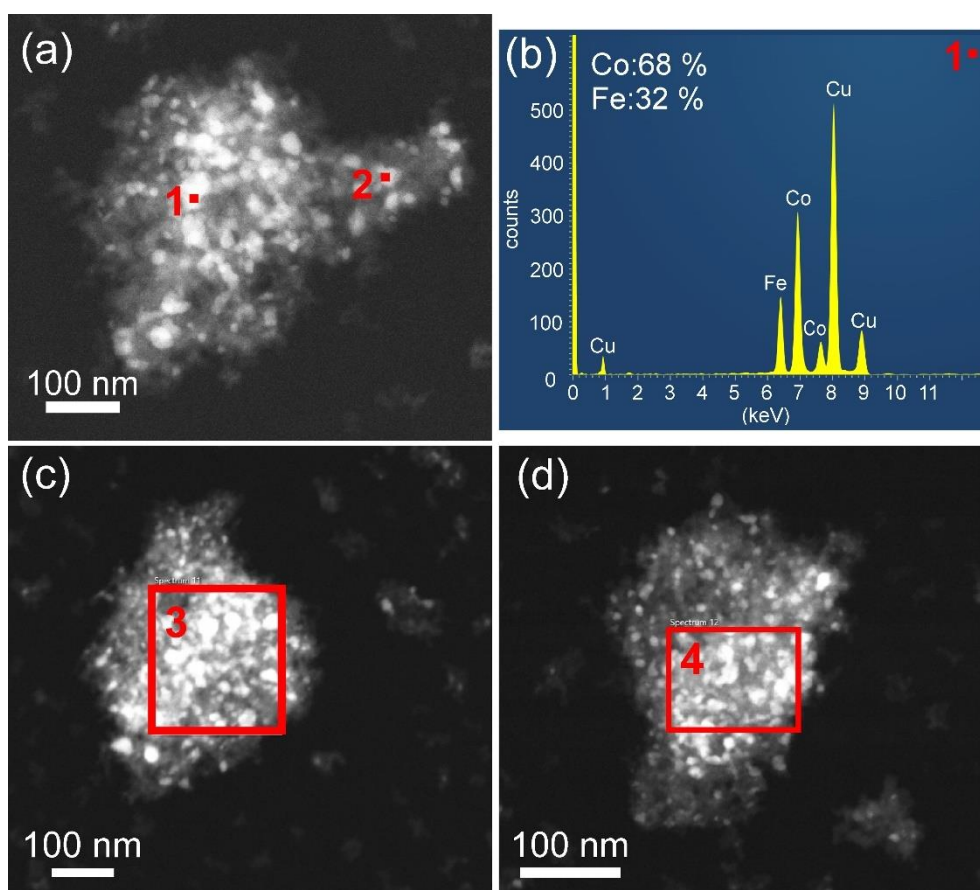

**Figure S3.** (a) HAADF-STEM image from the En-NHD-700,30m-SC, showing positions where point-EDS spectra were collected. (b) The point spectrum from position 1 and corresponding atomic percentage. (c,d) HAADF-STEM images showing other areas of interest (refer to Table S2 for all results).



**Table S2.** Fe compositions derived from point and areal EDS spectra obtained from sample En-NHD-700,30m-SC.

| Point/Area     | Fe at %   |
|----------------|-----------|
| point 1        | 32        |
| point 2        | 33        |
| area 3         | 35        |
| area 4         | 33        |
| <b>Average</b> | <b>33</b> |

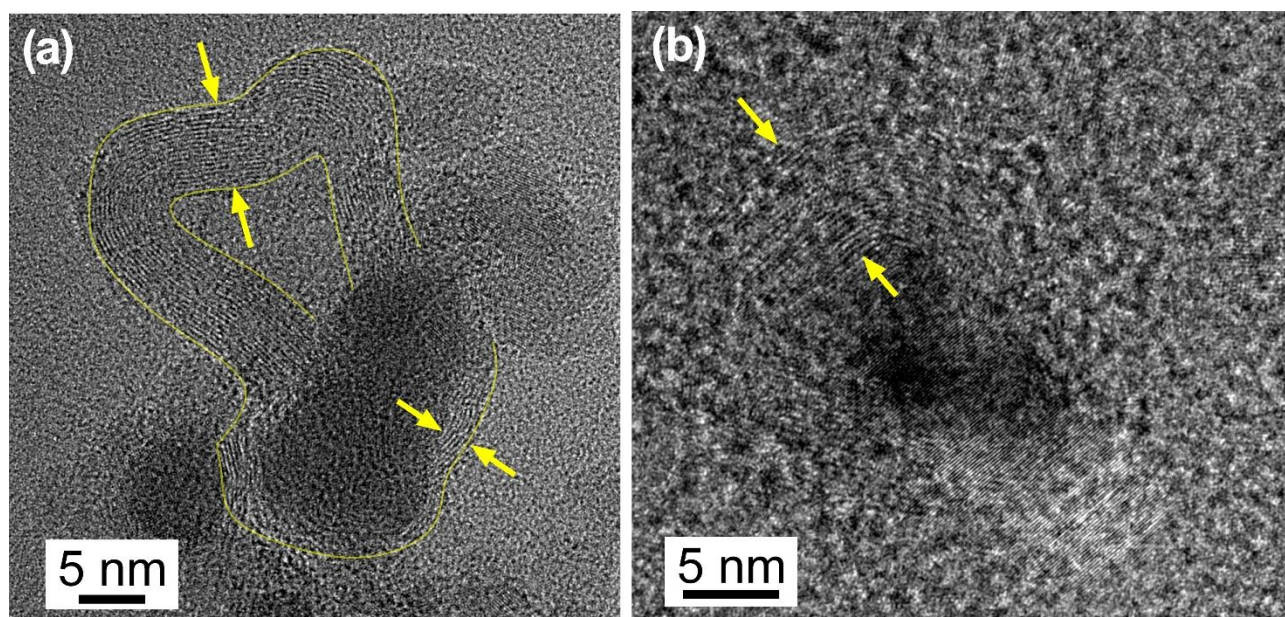

**Figure S4.** HRTEM images obtained from sample En-NHD-700,30m-SC, showing graphitic-type layers (yellow arrows) wrapping around FeCo NPs. Notably, in (a), these layers are observed to extend partially away from the NP.

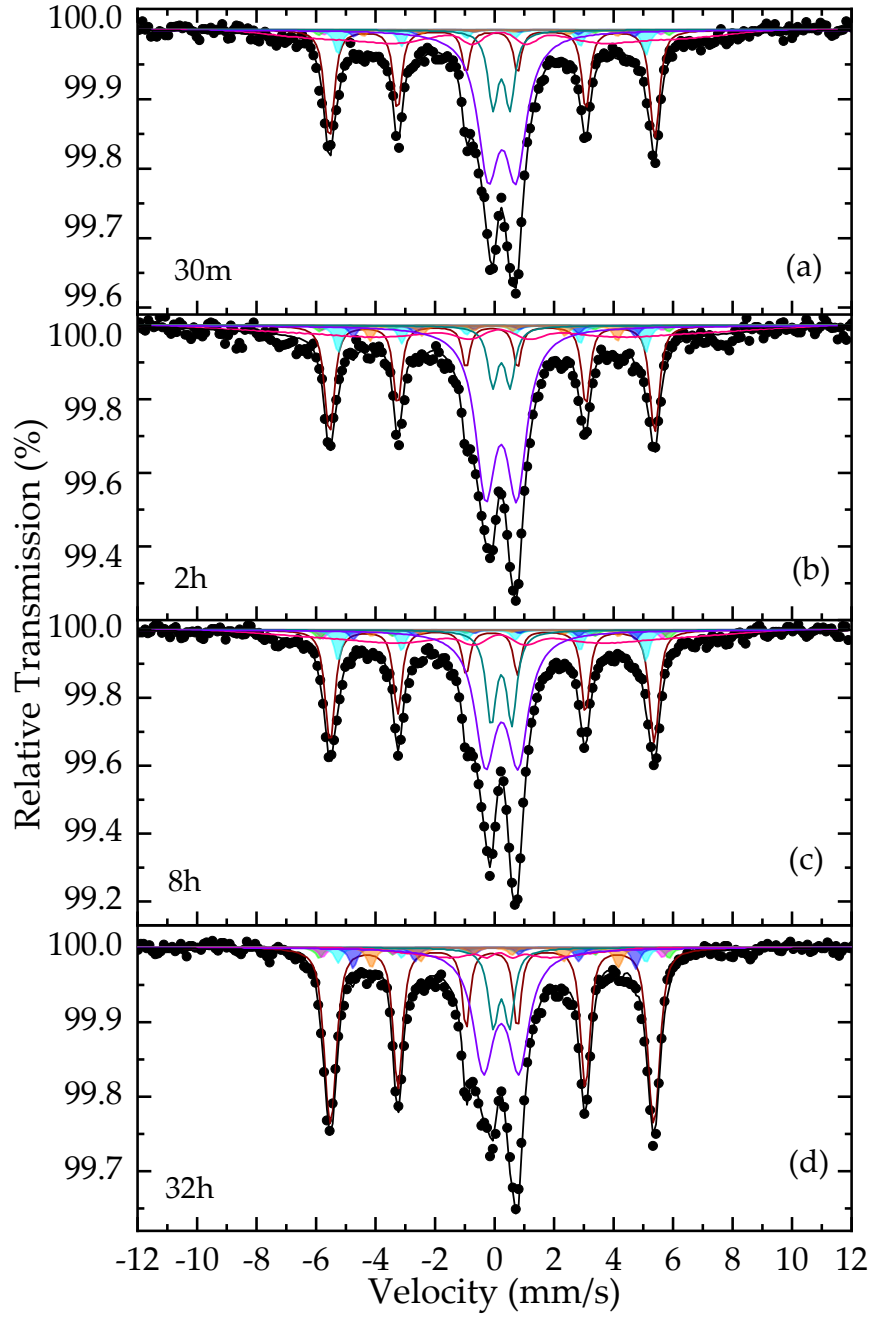

**Figure S5.** Fitted  $^{57}\text{Fe}$  Mössbauer spectra of the NHD-600,30m (a), NHD-600,2h (b), NHD-600,8h (c) and NHD-600,32h (d) samples collected at RT.

**Table S3.** Mössbauer hyperfine parameters as resulting from the best fits of the corresponding spectra of the samples shown on **Figure S5**. IS is the isomer shift (given relative to  $\alpha\text{-Fe}$  at 300 K),  $\Gamma/2$  is the half line-width, QS is the quadrupole splitting,  $2\epsilon$  is the quadrupole shift,  $B_{\text{hf}}^{\text{C}}$  is the central value of the hyperfine magnetic field,  $\Delta B_{\text{hf}}$  is the total spreading (Gaussian-type) of the  $B_{\text{hf}}$  values around the central  $B_{\text{hf}}^{\text{C}}$  value, and AA is the relative spectral absorption area of each component used to fit the spectra. Typical errors are  $\pm 0.02$  mm/s for IS,  $\Gamma/2$ ,  $2\epsilon$  and QS,  $\pm 3$  kOe for  $B_{\text{hf}}^{\text{C}}$  and  $\pm 3\%$  for AA.

| Sample      | Component                      | IS<br>(mm/s) | $\Gamma/2$<br>(mm/s) | QS or $2\epsilon$<br>(mm/s) | $B_{\text{hf}}^{\text{C}}$<br>(kOe) | $\Delta B_{\text{hf}}$<br>(kOe) | Area<br>(%) | Color  |
|-------------|--------------------------------|--------------|----------------------|-----------------------------|-------------------------------------|---------------------------------|-------------|--------|
| NHD-600,30m | $\text{Fe}_{35}\text{Co}_{65}$ | 0.02         | 0.15                 | 0.02                        | 340                                 | 5                               | 26          | Maroon |
|             | Martensitic Fe-Co (1)          | 0.09         | 0.15                 | 0.01                        | 366                                 | 0                               | 1           | Green  |

|             |                                   |      |       |       |     |     |    |           |
|-------------|-----------------------------------|------|-------|-------|-----|-----|----|-----------|
|             | Martensitic Fe-Co (2)             | 0.04 | 0.15  | 0.01  | 352 | 0   | 1  | Magenta   |
|             | Martensitic Fe-Co (3)             | 0.00 | 0.15  | 0.04  | 322 | 0   | 5  | Cyan      |
|             | Martensitic Fe-Co (4)             | 0.15 | 0.15  | -0.08 | 293 | 0   | 1  | Blue      |
|             | Martensitic Fe-Co (5)             | 0.05 | 0.15  | -0.15 | 265 | 0   | 1  | Orange    |
|             | SPM Fe <sup>3+</sup> (1)          | 0.34 | 0.2   | 0.57  | 0   | 0   | 10 | Dark Cyan |
|             | MCOL Fe <sup>3+</sup>             | 0.28 | 0.15  | 0.00  | 355 | 104 | 17 | Pink      |
|             | SPM Fe <sup>3+</sup> (2)          | 0.36 | 0.427 | 0.94  | 0   | 0   | 37 | Purple    |
| NHD-600,2h  | Fe <sub>35</sub> Co <sub>65</sub> | 0.02 | 0.15  | 0.02  | 340 | 5   | 24 | Maroon    |
|             | Martensitic Fe-Co (1)             | 0.09 | 0.15  | 0.01  | 365 | 0   | 1  | Green     |
|             | Martensitic Fe-Co (2)             | 0.04 | 0.15  | 0.01  | 355 | 0   | 1  | Magenta   |
|             | Martensitic Fe-Co (3)             | 0.00 | 0.15  | 0.04  | 321 | 0   | 5  | Cyan      |
|             | Martensitic Fe-Co (4)             | 0.15 | 0.15  | -0.08 | 295 | 0   | 2  | Blue      |
|             | Martensitic Fe-Co (5)             | 0.08 | 0.15  | 0.01  | 258 | 0   | 3  | Orange    |
|             | SPM Fe <sup>3+</sup> (1)          | 0.34 | 0.2   | 0.58  | 0   | 0   | 7  | Dark Cyan |
|             | MCOL Fe <sup>3+</sup>             | 0.28 | 0.15  | 0.00  | 393 | 158 | 17 | Pink      |
|             | SPM Fe <sup>3+</sup> (2)          | 0.33 | 0.41  | 1.05  | 0   | 0   | 39 | Purple    |
| NHD-600,8h  | Fe <sub>35</sub> Co <sub>65</sub> | 0.02 | 0.15  | 0.02  | 339 | 5   | 26 | Maroon    |
|             | Martensitic Fe-Co (1)             | 0.09 | 0.15  | 0.01  | 365 | 0   | 2  | Green     |
|             | Martensitic Fe-Co (2)             | 0.04 | 0.15  | 0.01  | 355 | 0   | 2  | Magenta   |
|             | Martensitic Fe-Co (3)             | 0.00 | 0.15  | 0.04  | 321 | 0   | 6  | Cyan      |
|             | Martensitic Fe-Co (4)             | 0.15 | 0.15  | -0.08 | 295 | 0   | 2  | Blue      |
|             | Martensitic Fe-Co (5)             | 0.08 | 0.15  | 0.09  | 258 | 0   | 1  | Orange    |
|             | SPM Fe <sup>3+</sup> (1)          | 0.34 | 0.2   | 0.70  | 0   | 0   | 11 | Dark Cyan |
|             | MCOL Fe <sup>3+</sup>             | 0.28 | 0.15  | 0.00  | 334 | 133 | 17 | Pink      |
|             | SPM Fe <sup>3+</sup> (2)          | 0.35 | 0.42  | 1.09  | 0   | 0   | 33 | Purple    |
| NHD-600,32h | Fe <sub>35</sub> Co <sub>65</sub> | 0.02 | 0.15  | 0.02  | 338 | 8   | 43 | Maroon    |
|             | Martensitic Fe-Co (1)             | 0.09 | 0.15  | 0.01  | 365 | 0   | 2  | Green     |
|             | Martensitic Fe-Co (2)             | 0.04 | 0.15  | 0.01  | 355 | 0   | 2  | Magenta   |
|             | Martensitic Fe-Co (3)             | 0.00 | 0.15  | 0.04  | 321 | 0   | 3  | Cyan      |
|             | Martensitic Fe-Co (4)             | 0.15 | 0.15  | -0.08 | 295 | 0   | 4  | Blue      |
|             | Martensitic Fe-Co (5)             | 0.08 | 0.15  | 0.09  | 258 | 3   | 4  | Orange    |
|             | SPM Fe <sup>3+</sup> (1)          | 0.34 | 0.20  | 0.55  | 0   | 0   | 9  | Dark Cyan |
|             | MCOL Fe <sup>3+</sup>             | 0.28 | 0.15  | 0.00  | 162 | 60  | 6  | Pink      |
|             | SPM Fe <sup>3+</sup> (2)          | 0.33 | 0.42  | 1.19  | 0   | 0   | 28 | Purple    |

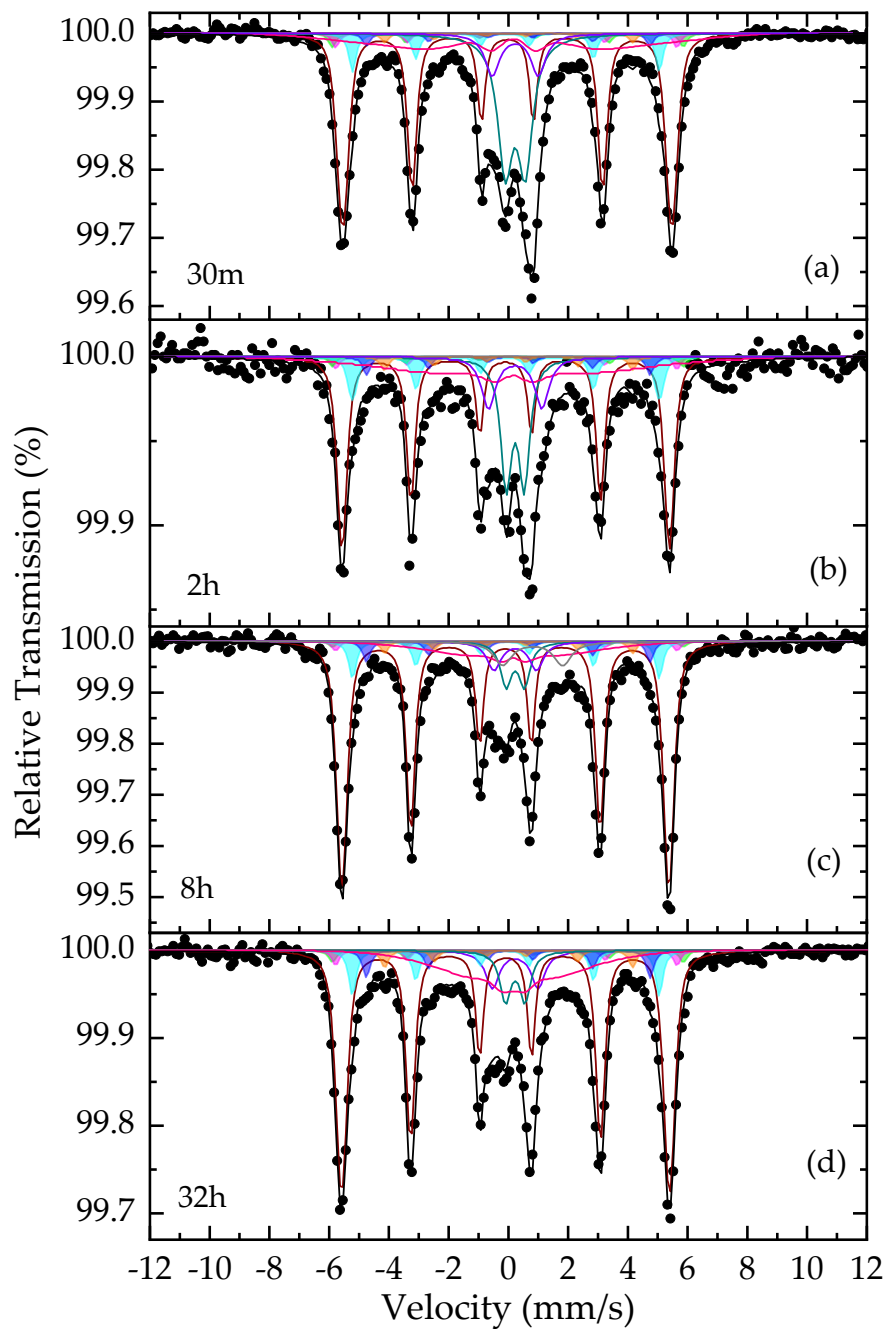

**Figure S6.** Fitted  $^{57}\text{Fe}$  Mössbauer spectra of the NHD-650,30m (a), NHD-650,2h (b), NHD-650,8h (c) and NHD-650,32h (d) samples collected at RT.

**Table S4.** Mössbauer hyperfine parameters as resulting from the best fits of the corresponding spectra of the samples shown on **Figure S6**. IS is the isomer shift (given relative to  $\alpha\text{-Fe}$  at 300 K),  $\Gamma/2$  is the half line-width, QS is the quadrupole splitting,  $2\epsilon$  is the quadrupole shift,  $B_{\text{hf}}^{\text{C}}$  is the central value of the hyperfine magnetic field,  $\Delta B_{\text{hf}}$  is the total spreading (Gaussian-type) of the  $B_{\text{hf}}$  values around the central  $B_{\text{hf}}^{\text{C}}$  value, and AA is the relative spectral absorption area of each component used to fit the spectra. Typical errors are  $\pm 0.02$  mm/s for IS,  $\Gamma/2$ ,  $2\epsilon$  and QS,  $\pm 3$  kOe for  $B_{\text{hf}}^{\text{C}}$  and  $\pm 3\%$  for AA.

| Sample      | Component                      | IS<br>(mm/s) | $\Gamma/2$<br>(mm/s) | QS or $2\epsilon$<br>(mm/s) | $B_{\text{hf}}^{\text{C}}$<br>(kOe) | $\Delta B_{\text{hf}}$<br>(kOe) | Area<br>(%) | Color  |
|-------------|--------------------------------|--------------|----------------------|-----------------------------|-------------------------------------|---------------------------------|-------------|--------|
| NHD-650,30m | $\text{Fe}_{35}\text{Co}_{65}$ | 0.07         | 0.15                 | -0.01                       | 342                                 | 8                               | 44          | Maroon |
|             | Martensitic Fe-Co (1)          | 0.09         | 0.15                 | 0.01                        | 365                                 | 0                               | 2           | Green  |

|             |                                   |      |      |       |     |     |    |           |
|-------------|-----------------------------------|------|------|-------|-----|-----|----|-----------|
|             | Martensitic Fe-Co (2)             | 0.04 | 0.15 | 0.01  | 355 | 0   | 2  | Magenta   |
|             | Martensitic Fe-Co (3)             | 0.00 | 0.15 | 0.04  | 319 | 0   | 6  | Cyan      |
|             | Martensitic Fe-Co (4)             | 0.15 | 0.15 | -0.08 | 295 | 0   | 2  | Blue      |
|             | Martensitic Fe-Co (5)             | 0.08 | 0.15 | 0.09  | 258 | 0   | 2  | Orange    |
|             | SPM Fe <sup>3+</sup> (1)          | 0.34 | 0.30 | 0.67  | 0   | 0   | 21 | Dark Cyan |
|             | MCOL Fe <sup>3+</sup>             | 0.28 | 0.15 | 0.00  | 285 | 105 | 14 | Pink      |
|             | SPM Fe <sup>3+</sup> (2)          | 0.34 | 0.30 | 1.54  | 0   | 0   | 7  | Purple    |
| NHD-650,2h  | Fe <sub>35</sub> Co <sub>65</sub> | 0.02 | 0.15 | 0.00  | 341 | 5   | 40 | Maroon    |
|             | Martensitic Fe-Co (1)             | 0.09 | 0.15 | 0.01  | 365 | 0   | 2  | Green     |
|             | Martensitic Fe-Co (2)             | 0.04 | 0.15 | 0.01  | 355 | 0   | 2  | Magenta   |
|             | Martensitic Fe-Co (3)             | 0.00 | 0.15 | 0.04  | 319 | 3   | 9  | Cyan      |
|             | Martensitic Fe-Co (4)             | 0.15 | 0.15 | -0.08 | 295 | 0   | 3  | Blue      |
|             | Martensitic Fe-Co (5)             | 0.08 | 0.15 | 0.09  | 258 | 0   | 2  | Orange    |
|             | SPM Fe <sup>3+</sup> (1)          | 0.34 | 0.22 | 0.60  | 0   | 0   | 15 | Dark Cyan |
|             | MCOL Fe <sup>3+</sup>             | 0.28 | 0.15 | 0.00  | 218 | 160 | 18 | Pink      |
|             | SPM Fe <sup>3+</sup> (2)          | 0.34 | 0.28 | 1.79  | 0   | 0   | 8  | Purple    |
| NHD-650,8h  | Fe <sub>35</sub> Co <sub>65</sub> | 0.00 | 0.15 | 0.00  | 340 | 6   | 58 | Maroon    |
|             | Martensitic Fe-Co (1)             | 0.09 | 0.15 | 0.01  | 365 | 0   | 1  | Green     |
|             | Martensitic Fe-Co (2)             | 0.04 | 0.15 | 0.01  | 355 | 0   | 2  | Magenta   |
|             | Martensitic Fe-Co (3)             | 0.00 | 0.15 | 0.04  | 319 | 0   | 7  | Cyan      |
|             | Martensitic Fe-Co (4)             | 0.15 | 0.15 | -0.08 | 295 | 0   | 4  | Blue      |
|             | Martensitic Fe-Co (5)             | 0.08 | 0.15 | 0.09  | 258 | 0   | 2  | Orange    |
|             | SPM Fe <sup>3+</sup> (1)          | 0.34 | 0.22 | 0.61  | 0   | 0   | 6  | Dark Cyan |
|             | MCOL Fe <sup>3+</sup>             | 0.28 | 0.15 | 0.00  | 134 | 105 | 11 | Pink      |
|             | SPM Fe <sup>3+</sup> (2)          | 0.34 | 0.28 | 1.42  | 0   | 0   | 5  | Purple    |
|             | SPM Fe <sup>2+</sup>              | 0.92 | 0.36 | 2.00  | 0   | 0   | 5  | Grey      |
| NHD-650,32h | Fe <sub>35</sub> Co <sub>65</sub> | 0.01 | 0.15 | 0.00  | 341 | 7   | 53 | Maroon    |
|             | Martensitic Fe-Co (1)             | 0.09 | 0.15 | 0.01  | 365 | 0   | 2  | Green     |
|             | Martensitic Fe-Co (2)             | 0.04 | 0.15 | 0.01  | 355 | 0   | 2  | Magenta   |
|             | Martensitic Fe-Co (3)             | 0.00 | 0.15 | 0.04  | 319 | 0   | 7  | Cyan      |
|             | Martensitic Fe-Co (4)             | 0.15 | 0.15 | -0.08 | 295 | 0   | 4  | Blue      |
|             | Martensitic Fe-Co (5)             | 0.08 | 0.15 | 0.09  | 258 | 0   | 3  | Orange    |
|             | SPM Fe <sup>3+</sup> (1)          | 0.34 | 0.22 | 0.66  | 0   | 0   | 6  | Dark Cyan |
|             | MCOL Fe <sup>3+</sup>             | 0.28 | 0.15 | 0.00  | 115 | 100 | 17 | Pink      |
|             | SPM Fe <sup>3+</sup> (2)          | 0.34 | 0.28 | 1.53  | 0   | 0   | 6  | Purple    |



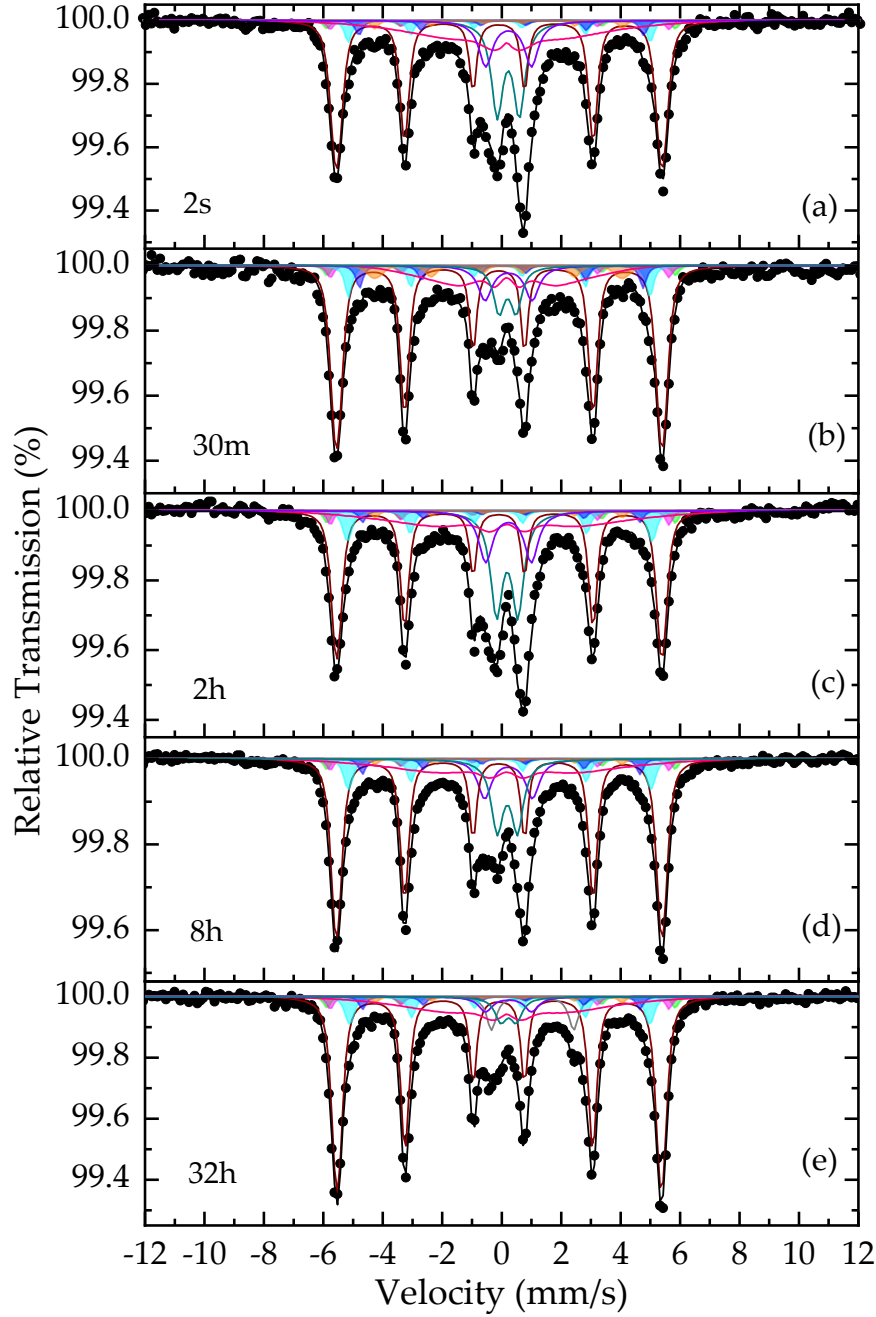

**Figure S7.** Fitted  $^{57}\text{Fe}$  Mössbauer spectra of the NHD-700,2s (a), NHD-700,30m (b), NHD-700,2h (c), NHD-700,8h (d) and NHD-700,32h (e) samples collected at RT.

**Table S5.** Mössbauer hyperfine parameters as resulting from the best fits of the corresponding spectra of the samples shown on **Figure S7**. IS is the isomer shift (given relative to  $\alpha\text{-Fe}$  at 300 K),  $\Gamma/2$  is the half line-width, QS is the quadrupole splitting,  $2\epsilon$  is the quadrupole shift,  $B_{\text{hf}}^{\text{C}}$  is the central value of the hyperfine magnetic field,  $\Delta B_{\text{hf}}$  is the total spreading (Gaussian-type) of the  $B_{\text{hf}}$  values around the central  $B_{\text{hf}}^{\text{C}}$  value, and AA is the relative spectral absorption area of each component used to fit the spectra. Typical errors are  $\pm 0.02$  mm/s for IS,  $\Gamma/2$ ,  $2\epsilon$  and QS,  $\pm 3$  kOe for  $B_{\text{hf}}^{\text{C}}$  and  $\pm 3\%$  for AA.

| Sample     | Component                      | IS<br>(mm/s) | $\Gamma/2$<br>(mm/s) | QS or $2\epsilon$<br>(mm/s) | $B_{\text{hf}}^{\text{C}}$<br>(kOe) | $\Delta B_{\text{hf}}$<br>(kOe) | Area<br>(%) | Color  |
|------------|--------------------------------|--------------|----------------------|-----------------------------|-------------------------------------|---------------------------------|-------------|--------|
| NHD-700,2s | $\text{Fe}_{35}\text{Co}_{65}$ | 0.02         | 0.14                 | 0.02                        | 340                                 | 8                               | 44          | Maroon |
|            | Martensitic Fe-Co (1)          | 0.09         | 0.14                 | 0.01                        | 364                                 | 0                               | 2           | Green  |

|             |                                   |      |      |       |     |     |    |           |
|-------------|-----------------------------------|------|------|-------|-----|-----|----|-----------|
|             | Martensitic Fe-Co (2)             | 0.04 | 0.14 | 0.01  | 354 | 0   | 2  | Magenta   |
|             | Martensitic Fe-Co (3)             | 0.00 | 0.14 | 0.04  | 316 | 0   | 4  | Cyan      |
|             | Martensitic Fe-Co (4)             | 0.13 | 0.14 | -0.08 | 298 | 0   | 3  | Blue      |
|             | Martensitic Fe-Co (5)             | 0.08 | 0.14 | -0.15 | 259 | 0   | 2  | Orange    |
|             | MCOL Fe <sup>3+</sup>             | 0.28 | 0.14 | 0.00  | 142 | 137 | 20 | Pink      |
|             | SPM Fe <sup>3+</sup> (1)          | 0.33 | 0.23 | 0.75  | 0   | 0   | 15 | Dark Cyan |
|             | SPM Fe <sup>3+</sup> (2)          | 0.34 | 0.28 | 1.54  | 0   | 0   | 9  | Purple    |
| NHD-700,30m | Fe <sub>35</sub> Co <sub>65</sub> | 0.02 | 0.14 | 0.02  | 340 | 8   | 52 | Maroon    |
|             | Martensitic Fe-Co (1)             | 0.09 | 0.14 | 0.01  | 364 | 0   | 2  | Green     |
|             | Martensitic Fe-Co (2)             | 0.04 | 0.14 | 0.01  | 354 | 0   | 2  | Magenta   |
|             | Martensitic Fe-Co (3)             | 0.00 | 0.14 | 0.04  | 315 | 0   | 6  | Cyan      |
|             | Martensitic Fe-Co (4)             | 0.13 | 0.14 | -0.08 | 296 | 0   | 5  | Blue      |
|             | Martensitic Fe-Co (5)             | 0.08 | 0.14 | -0.15 | 259 | 13  | 5  | Orange    |
|             | MCOL Fe <sup>3+</sup>             | 0.28 | 0.14 | 0.00  | 155 | 65  | 14 | Pink      |
|             | SPM Fe <sup>3+</sup> (1)          | 0.30 | 0.22 | 0.58  | 0   | 0   | 7  | D. cyan   |
|             | SPM Fe <sup>3+</sup> (2)          | 0.34 | 0.28 | 1.58  | 0   | 0   | 7  | Purple    |
| NHD-700,2h  | Fe <sub>35</sub> Co <sub>65</sub> | 0.02 | 0.14 | 0.02  | 340 | 6   | 39 | Maroon    |
|             | Martensitic Fe-Co (1)             | 0.09 | 0.14 | 0.01  | 364 | 0   | 3  | Green     |
|             | Martensitic Fe-Co (2)             | 0.04 | 0.14 | 0.01  | 354 | 0   | 3  | Magenta   |
|             | Martensitic Fe-Co (3)             | 0.02 | 0.14 | 0.04  | 318 | 5   | 7  | Cyan      |
|             | Martensitic Fe-Co (4)             | 0.13 | 0.14 | -0.08 | 290 | 0   | 2  | Blue      |
|             | Martensitic Fe-Co (5)             | 0.08 | 0.14 | -0.15 | 258 | 0   | 1  | Orange    |
|             | MCOL Fe <sup>3+</sup>             | 0.28 | 0.14 | 0.00  | 212 | 120 | 18 | Pink      |
|             | SPM Fe <sup>3+</sup> (1)          | 0.29 | 0.24 | 0.72  | 0   | 0   | 17 | Dark Cyan |
|             | SPM Fe <sup>3+</sup> (2)          | 0.34 | 0.28 | 1.53  | 0   | 0   | 10 | Purple    |
| NHD-700,8h  | Fe <sub>35</sub> Co <sub>65</sub> | 0.02 | 0.14 | 0.02  | 340 | 7   | 49 | Maroon    |
|             | Martensitic Fe-Co (1)             | 0.09 | 0.14 | 0.01  | 364 | 0   | 2  | Green     |
|             | Martensitic Fe-Co (2)             | 0.04 | 0.14 | 0.01  | 354 | 0   | 2  | Magenta   |
|             | Martensitic Fe-Co (3)             | 0.02 | 0.14 | 0.04  | 316 | 5   | 8  | Cyan      |
|             | Martensitic Fe-Co (4)             | 0.13 | 0.14 | -0.08 | 290 | 0   | 3  | Blue      |
|             | Martensitic Fe-Co (5)             | 0.08 | 0.14 | -0.15 | 258 | 0   | 1  | Orange    |
|             | MCOL Fe <sup>3+</sup>             | 0.28 | 0.14 | 0.00  | 201 | 120 | 16 | Pink      |
|             | SPM Fe <sup>3+</sup> (1)          | 0.29 | 0.24 | 0.68  | 0   | 0   | 12 | Dark Cyan |
|             | SPM Fe <sup>3+</sup> (2)          | 0.34 | 0.28 | 1.61  | 0   | 0   | 8  | Purple    |
| NHD-700,32h | Fe <sub>35</sub> Co <sub>65</sub> | 0.02 | 0.14 | 0.02  | 339 | 7   | 55 | Maroon    |
|             | Martensitic Fe-Co (1)             | 0.09 | 0.14 | 0.01  | 364 | 0   | 2  | Green     |
|             | Martensitic Fe-Co (2)             | 0.04 | 0.14 | 0.01  | 354 | 0   | 3  | Magenta   |
|             | Martensitic Fe-Co (3)             | 0.02 | 0.14 | 0.04  | 314 | 5   | 7  | Cyan      |
|             | Martensitic Fe-Co (4)             | 0.13 | 0.14 | -0.08 | 290 | 0   | 3  | Blue      |
|             | Martensitic Fe-Co (5)             | 0.08 | 0.14 | -0.15 | 258 | 0   | 1  | Orange    |

|                          |      |      |      |     |     |    |           |
|--------------------------|------|------|------|-----|-----|----|-----------|
| MCOL Fe <sup>3+</sup>    | 0.28 | 0.14 | 0.00 | 165 | 120 | 17 | Pink      |
| SPM Fe <sup>3+</sup> (1) | 0.34 | 0.24 | 0.52 | 0   | 0   | 4  | Dark Cyan |
| SPM Fe <sup>3+</sup> (2) | 0.34 | 0.28 | 1.55 | 0   | 0   | 3  | Purple    |
| SPM Fe <sup>2+</sup>     | 1.14 | 0.19 | 2.76 | 0   | 0   | 5  | Grey      |

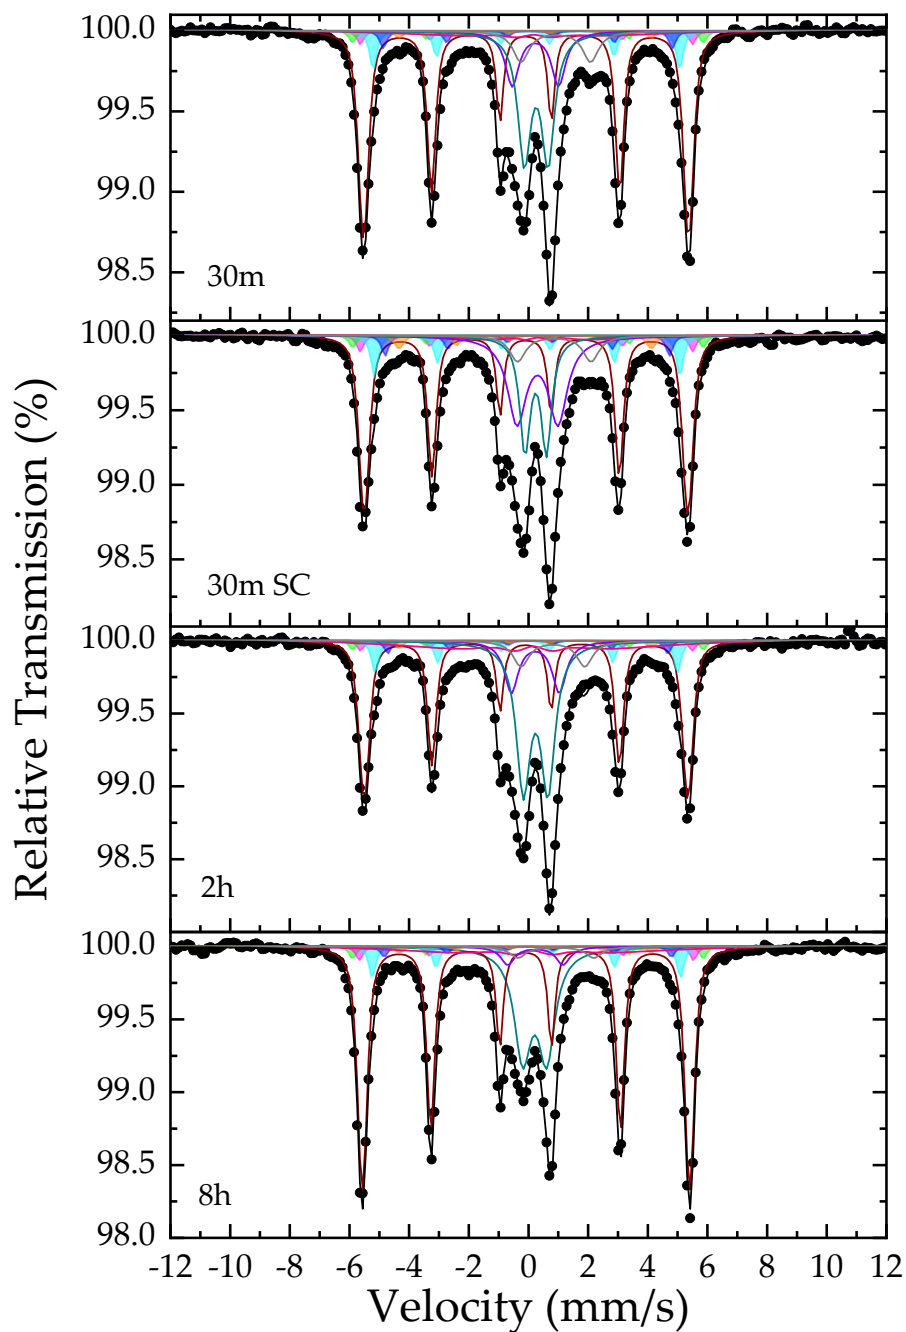

**Figure S8.** Fitted <sup>57</sup>Fe Mössbauer spectra of the <sup>57</sup>Fe enriched En-NHD-700,30m (a), En-NHD-700,30m-SC (b), En-NHD-700,2h (c) and En-NHD-700,8h (d) samples collected at RT.

**Table S6.** Mössbauer hyperfine parameters as resulting from the best fits of the corresponding spectra of the samples shown on **Figure S8**. IS is the isomer shift (given relative to  $\alpha$ -Fe at 300 K),  $\Gamma/2$  is the half line-width, QS is the quadrupole splitting,  $2\varepsilon$  is the quadrupole shift,  $B_{\text{hf}}^{\text{C}}$  is the central value of the hyperfine magnetic field,  $\Delta B_{\text{hf}}$  is the total spreading (Gaussian-type) of the  $B_{\text{hf}}$  values around the central  $B_{\text{hf}}^{\text{C}}$  value, and AA is the relative spectral absorption area of each component used to fit the spectra. Typical errors are  $\pm 0.02$  mm/s for IS,  $\Gamma/2$ ,  $2\varepsilon$  and QS,  $\pm 3$  kOe for  $B_{\text{hf}}^{\text{C}}$  and  $\pm 3\%$  for AA.

| Sample            | Component                      | IS<br>(mm/s) | $\Gamma/2$<br>(mm/s) | QS or $2\varepsilon$<br>(mm/s) | $B_{\text{hf}}^{\text{C}}$<br>(kOe) | $\Delta B_{\text{hf}}$<br>(kOe) | Area (%) | Color     |
|-------------------|--------------------------------|--------------|----------------------|--------------------------------|-------------------------------------|---------------------------------|----------|-----------|
| En-NHD-700,30m    | $\text{Fe}_{33}\text{Co}_{67}$ | 0.02         | 0.14                 | 0.02                           | 339                                 | 6                               | 46       | Maroon    |
|                   | Martensitic Fe-Co (1)          | 0.09         | 0.14                 | 0.01                           | 365                                 | 0                               | 2        | Green     |
|                   | Martensitic Fe-Co (2)          | 0.04         | 0.14                 | 0.01                           | 346                                 | 0                               | 2        | Magenta   |
|                   | Martensitic Fe-Co (3)          | 0.02         | 0.14                 | 0.04                           | 319                                 | 0                               | 7        | Cyan      |
|                   | Martensitic Fe-Co (4)          | 0.13         | 0.14                 | -0.09                          | 301                                 | 0                               | 3        | Blue      |
|                   | Martensitic Fe-Co (5)          | 0.08         | 0.14                 | -0.15                          | 263                                 | 3                               | 1        | Orange    |
|                   | MCOL $\text{Fe}^{3+}$          | 0.28         | 0.14                 | 0.00                           | 216                                 | 120                             | 5        | Pink      |
|                   | SPM $\text{Fe}^{3+}$ (1)       | 0.36         | 0.26                 | 0.79                           | 0                                   | 0                               | 20       | Dark Cyan |
|                   | SPM $\text{Fe}^{3+}$ (2)       | 0.34         | 0.28                 | 1.55                           | 0                                   | 0                               | 9        | Purple    |
|                   | SPM $\text{Fe}^{2+}$           | 1.02         | 0.32                 | 2.33                           | 0                                   | 0                               | 6        | Grey      |
| En-NHD-700,30m-SC | $\text{Fe}_{33}\text{Co}_{67}$ | 0.02         | 0.14                 | 0.02                           | 337                                 | 7                               | 41       | Maroon    |
|                   | Martensitic Fe-Co (1)          | 0.09         | 0.14                 | 0.01                           | 365                                 | 0                               | 2        | Green     |
|                   | Martensitic Fe-Co (2)          | 0.04         | 0.14                 | 0.01                           | 346                                 | 0                               | 3        | Magenta   |
|                   | Martensitic Fe-Co (3)          | 0.05         | 0.14                 | 0.04                           | 318                                 | 0                               | 7        | Cyan      |
|                   | Martensitic Fe-Co (4)          | 0.12         | 0.14                 | -0.09                          | 296                                 | 0                               | 4        | Blue      |
|                   | Martensitic Fe-Co (5)          | 0.08         | 0.14                 | -0.15                          | 263                                 | 5                               | 3        | Orange    |
|                   | MCOL $\text{Fe}^{3+}$          | 0.43         | 0.14                 | 0.00                           | 160                                 | 60                              | 2        | Pink      |
|                   | SPM $\text{Fe}^{3+}$ (1)       | 0.35         | 0.21                 | 0.72                           | 0                                   | 0                               | 14       | Dark Cyan |
|                   | SPM $\text{Fe}^{3+}$ (2)       | 0.41         | 0.38                 | 1.37                           | 0                                   | 0                               | 19       | Purple    |
|                   | SPM $\text{Fe}^{2+}$           | 0.97         | 0.32                 | 2.46                           | 0                                   | 0                               | 5        | Grey      |
| En-NHD-700,2h     | $\text{Fe}_{33}\text{Co}_{67}$ | 0.02         | 0.14                 | 0.02                           | 337                                 | 7                               | 38       | Maroon    |
|                   | Martensitic Fe-Co (1)          | 0.09         | 0.14                 | 0.01                           | 365                                 | 0                               | 2        | Green     |

|               |                                   |      |      |       |     |     |    |           |
|---------------|-----------------------------------|------|------|-------|-----|-----|----|-----------|
| En-NHD-700,8h | Martensitic Fe-Co (2)             | 0.04 | 0.14 | 0.01  | 346 | 0   | 2  | Magenta   |
|               | Martensitic Fe-Co (3)             | 0.02 | 0.14 | 0.04  | 315 | 0   | 6  | Cyan      |
|               | Martensitic Fe-Co (4)             | 0.13 | 0.14 | -0.09 | 292 | 0   | 2  | Blue      |
|               | Martensitic Fe-Co (5)             | 0.08 | 0.14 | -0.15 | 263 | 3   | 2  | Orange    |
|               | MCOL Fe <sup>3+</sup>             | 0.28 | 0.14 | 0.00  | 234 | 120 | 8  | Pink      |
|               | SPM Fe <sup>3+</sup> (1)          | 0.35 | 0.28 | 0.83  | 0   | 0   | 26 | Dark Cyan |
|               | SPM Fe <sup>3+</sup> (2)          | 0.34 | 0.28 | 1.61  | 0   | 0   | 9  | Purple    |
|               | SPM Fe <sup>2+</sup>              | 0.93 | 0.32 | 2.13  | 0   | 0   | 5  | Grey      |
|               | Fe <sub>33</sub> Co <sub>67</sub> | 0.02 | 0.14 | 0.02  | 341 | 5   | 53 | Maroon    |
|               | Martensitic Fe-Co (1)             | 0.09 | 0.14 | 0.01  | 365 | 0   | 2  | Green     |
|               | Martensitic Fe-Co (2)             | 0.04 | 0.14 | 0.01  | 348 | 0   | 2  | Magenta   |
|               | Martensitic Fe-Co (3)             | 0.02 | 0.14 | 0.04  | 321 | 0   | 6  | Cyan      |
|               | Martensitic Fe-Co (4)             | 0.13 | 0.14 | -0.09 | 299 | 0   | 2  | Blue      |
|               | Martensitic Fe-Co (5)             | 0.08 | 0.14 | -0.15 | 263 | 3   | 1  | Orange    |
|               | MCOL Fe <sup>3+</sup>             | 0.28 | 0.14 | 0.00  | 234 | 120 | 6  | Pink      |
|               | SPM Fe <sup>3+</sup> (1)          | 0.31 | 0.34 | 0.80  | 0   | 0   | 22 | Dark Cyan |
|               | SPM Fe <sup>3+</sup> (2)          | 0.34 | 0.28 | 1.85  | 0   | 0   | 3  | Purple    |
|               | SPM Fe <sup>2+</sup>              | 1.02 | 0.32 | 2.55  | 0   | 0   | 2  | Grey      |

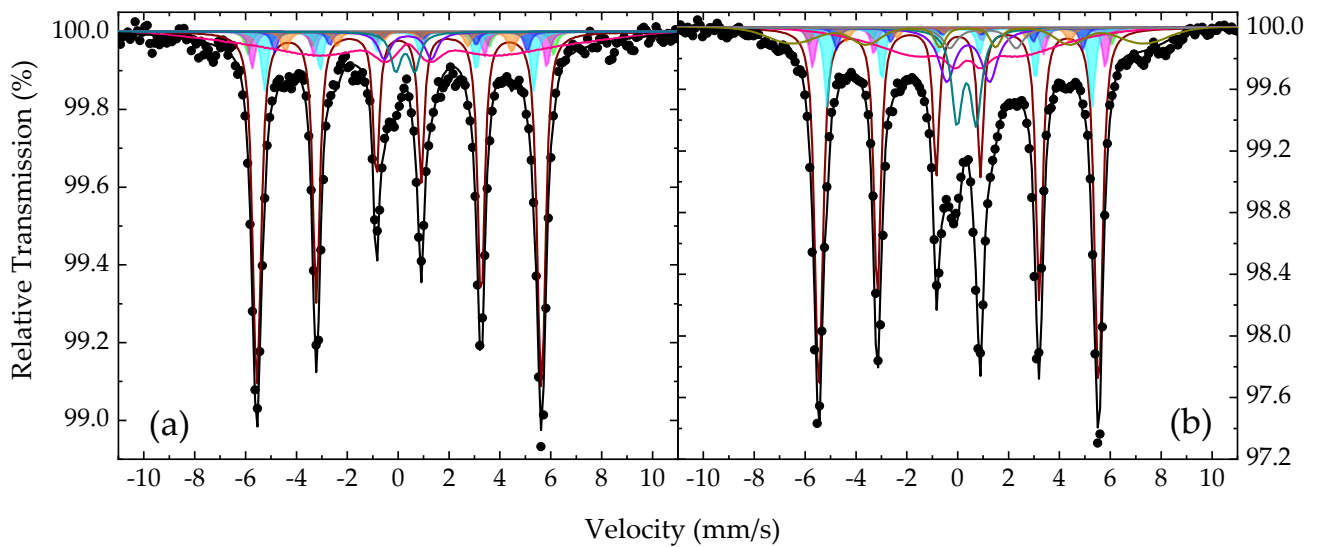

**Figure S9.** Fitted <sup>57</sup>Fe Mössbauer spectra of NHD-700,30m sample (a) and of En-NHD-700,30m-SC (b) collected at 11 K.



**Table S7.** Mössbauer hyperfine parameters as resulting from the best fits of the corresponding spectra of the samples shown on **Figure S9**. IS is the isomer shift (given relative to  $\alpha$ -Fe at 300 K),  $\Gamma/2$  is the half line-width, QS is the quadrupole splitting,  $2\epsilon$  is the quadrupole shift,  $B_{hf}^C$  is the central value of the hyperfine magnetic field,  $\Delta B_{hf}$  is the total spreading (Gaussian-type) of the  $B_{hf}$  values around the central  $B_{hf}^C$  value, and AA is the relative spectral absorption area of each component used to fit the spectra. Typical errors are  $\pm 0.02$  mm/s for IS,  $\Gamma/2$ ,  $2\epsilon$  and QS,  $\pm 3$  kOe for  $B_{hf}^C$  and  $\pm 3\%$  for AA.

| Sample                                  | Component            | IS<br>(mm/s) | $\Gamma/2$<br>(mm/s) | QS or $2\epsilon$<br>(mm/s) | $B_{hf}^C$<br>(kOe) | $\Delta B_{hf}$<br>(kOe) | Area<br>(%) | Color       |
|-----------------------------------------|----------------------|--------------|----------------------|-----------------------------|---------------------|--------------------------|-------------|-------------|
| Non-enriched<br>NHDs-<br>700,30m        | $Fe_{35}Co_{65}$     | 0.14         | 0.14                 | 0.02                        | 347                 | 6                        | 52          | Maroon      |
|                                         | Martensitic FeCo (1) | 0.21         | 0.14                 | 0.01                        | 373                 | 0                        | 3           | Green       |
|                                         | Martensitic FeCo (2) | 0.16         | 0.14                 | 0.01                        | 360                 | 0                        | 4           | Magenta     |
|                                         | Martensitic FeCo (3) | 0.13         | 0.14                 | 0.04                        | 329                 | 0                        | 7           | Cyan        |
|                                         | Martensitic FeCo (4) | 0.26         | 0.14                 | -0.08                       | 309                 | 0                        | 2           | Blue        |
|                                         | Martensitic FeCo (5) | 0.20         | 0.14                 | -0.15                       | 277                 | 5                        | 3           | Orange      |
|                                         | MCOL $Fe^{3+}$       | 0.49         | 0.14                 | 0.00                        | 323                 | 156                      | 21          | Pink        |
|                                         | SPM $Fe^{3+}$ (1)    | 0.38         | 0.24                 | 0.75                        | 0                   | 0                        | 5           | Dark Cyan   |
|                                         | SPM $Fe^{3+}$ (2)    | 0.49         | 0.28                 | 1.85                        | 0                   | 0                        | 4           | Purple      |
| Enriched<br>NHDs-<br>700,30m<br>with SC | $Fe_{33}Co_{67}$     | 0.14         | 0.14                 | 0.02                        | 342                 | 5                        | 43          | Maroon      |
|                                         | Martensitic FeCo (1) | 0.21         | 0.14                 | 0.01                        | 370                 | 0                        | 2           | Green       |
|                                         | Martensitic FeCo (2) | 0.16         | 0.14                 | 0.01                        | 358                 | 0                        | 4           | Magenta     |
|                                         | Martensitic FeCo (3) | 0.17         | 0.14                 | 0.04                        | 324                 | 0                        | 8           | Cyan        |
|                                         | Martensitic FeCo (4) | 0.24         | 0.14                 | -0.09                       | 301                 | 0                        | 2           | Blue        |
|                                         | Martensitic FeCo (5) | 0.20         | 0.14                 | -0.15                       | 273                 | 5                        | 2           | Orange      |
|                                         | MCOL $Fe^{3+}$       | 0.51         | 0.14                 | 0.00                        | 180                 | 118                      | 15          | Pink        |
|                                         | SPM $Fe^{3+}$ (1)    | 0.46         | 0.25                 | 0.76                        | 0                   | 0                        | 8           | Dark Cyan   |
|                                         | SPM $Fe^{3+}$ (2)    | 0.52         | 0.38                 | 1.68                        | 0                   | 0                        | 7           | Purple      |
|                                         | SPM $Fe^{2+}$        | 1.11         | 0.34                 | 2.61                        | 0                   | 0                        | 2           | Grey        |
|                                         | MRES $Fe^{3+}$       | 0.51         | 0.14                 | 0.00                        | 429                 | 54                       | 9           | Dark Yellow |

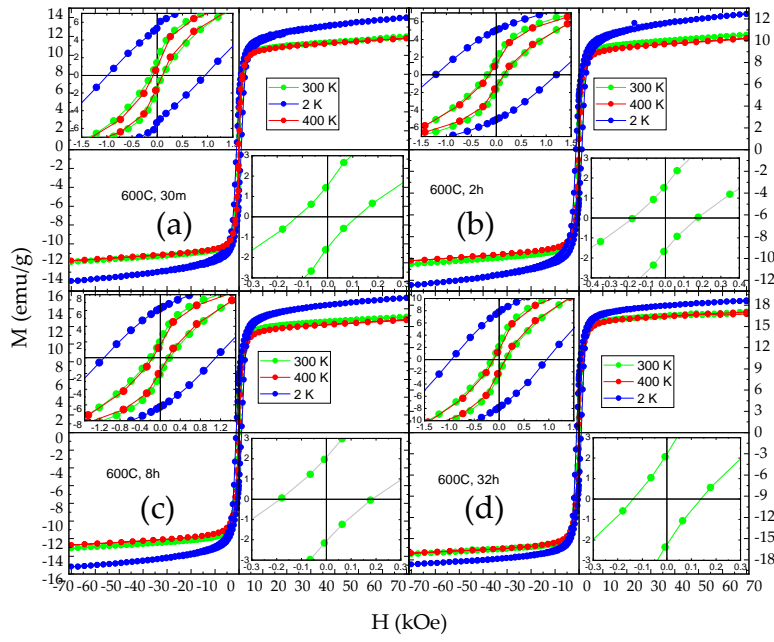

**Figure S10.**  $M$  vs.  $H$  isothermal loops of the NHD-600,30m (a), and NHD-600,2h (b), NHD-600,8h (c) and NHD-600,32h (d) samples measured at different temperatures indicated by different colors. The insets in each set of measurements show the details of the loops' characteristics around zero  $H$  field for all temperatures (upper left) and with even more detail for the 300 K loop (lower right).

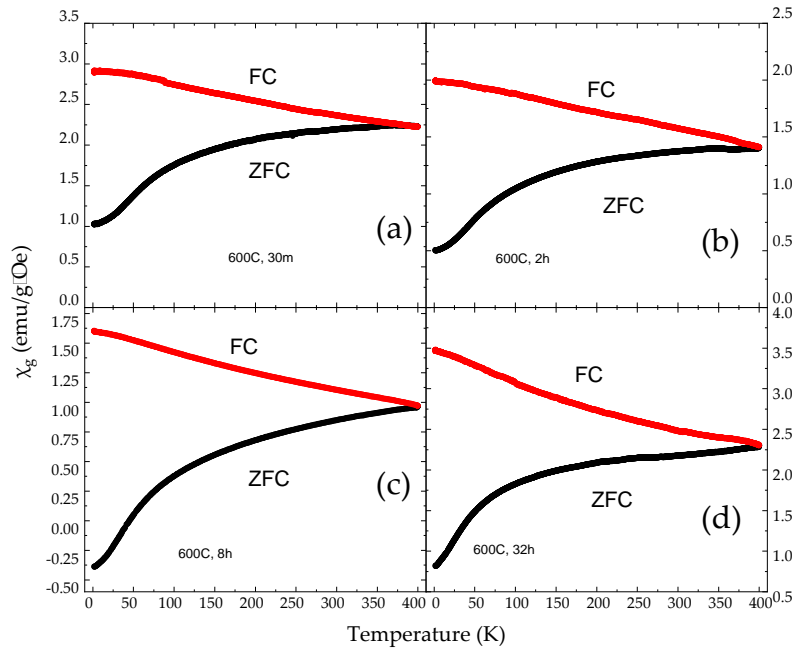

**Figure S11.**  $\chi_g$  vs.  $T$  measurements of the NHD-600,30m (a), NHD-600,2h (b), NHD-600,8h (c) and NHD-600,32h (d) samples under an applied field of 99 Oe.

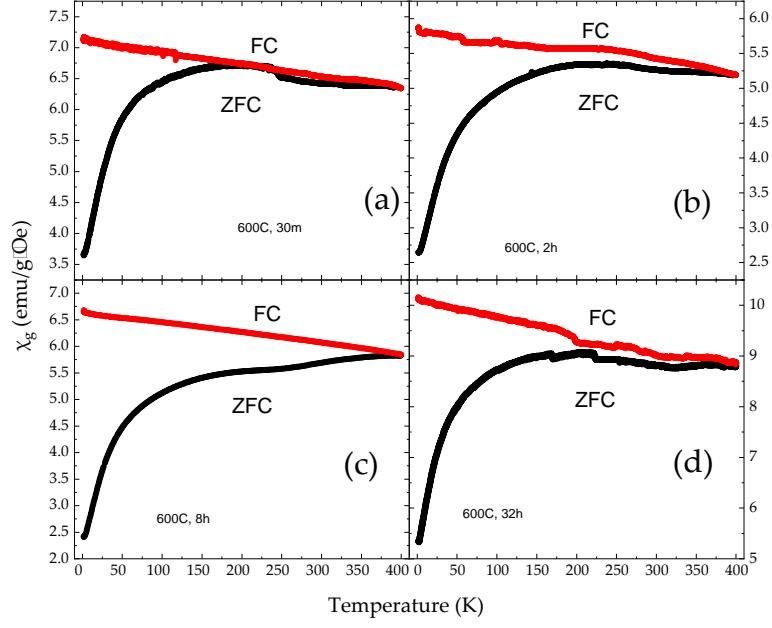

**Figure S12.**  $\chi_g$  vs.  $T$  measurements of the NHD-600,30m (a), NHD-600,2h (b), NHD-600,8h (c) and NHD-600,32h (d) samples under an applied field of 999 Oe.

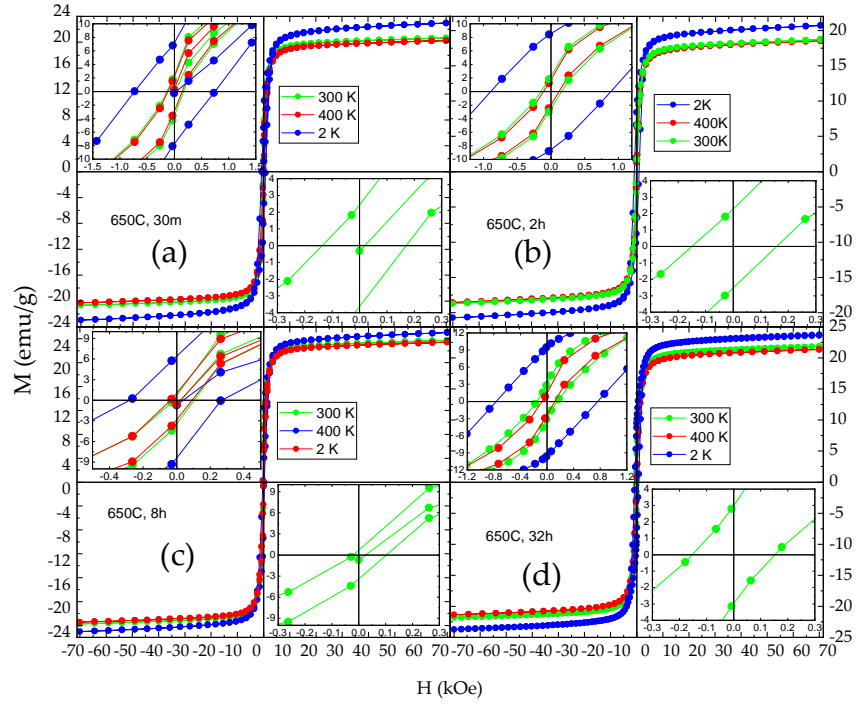

**Figure S13.**  $M$  vs.  $H$  isothermal loops of the NHD-650,30m (a), and NHD-650,2h (b), NHD-650,8h (c) and NHD-650,32h (d) samples measured at different temperatures indicated by different colors. The insets in each set of measurements show the details of the loops' characteristics around zero  $H$  field for all temperatures (upper left) and with even more detail for the 300 K loop (lower right).

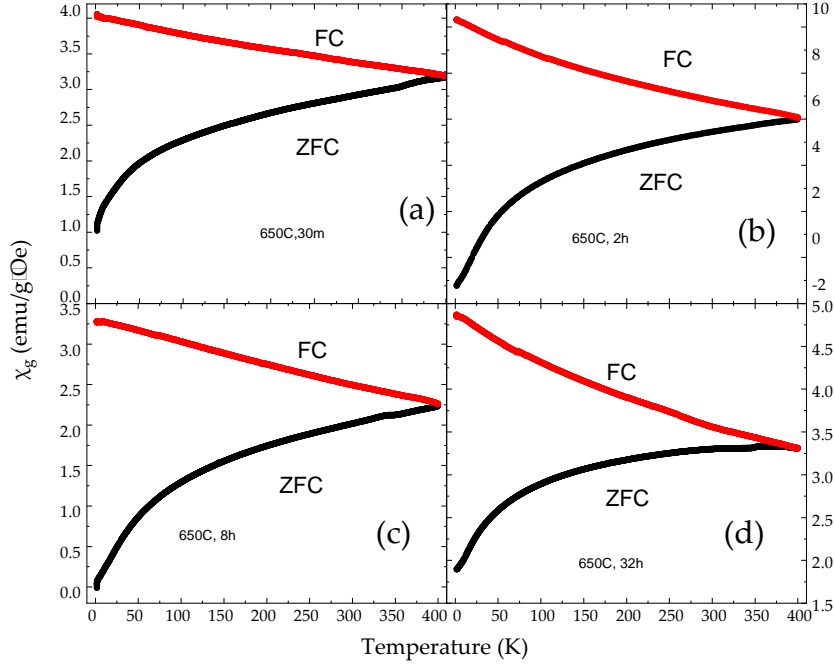

**Figure S14.**  $\chi_g$  vs. T measurements of the NHD-650,30m (a), NHD-650,2h (b), NHD-650,8h (c) and NHD-650,32h (d) samples under an applied field of 99 Oe.

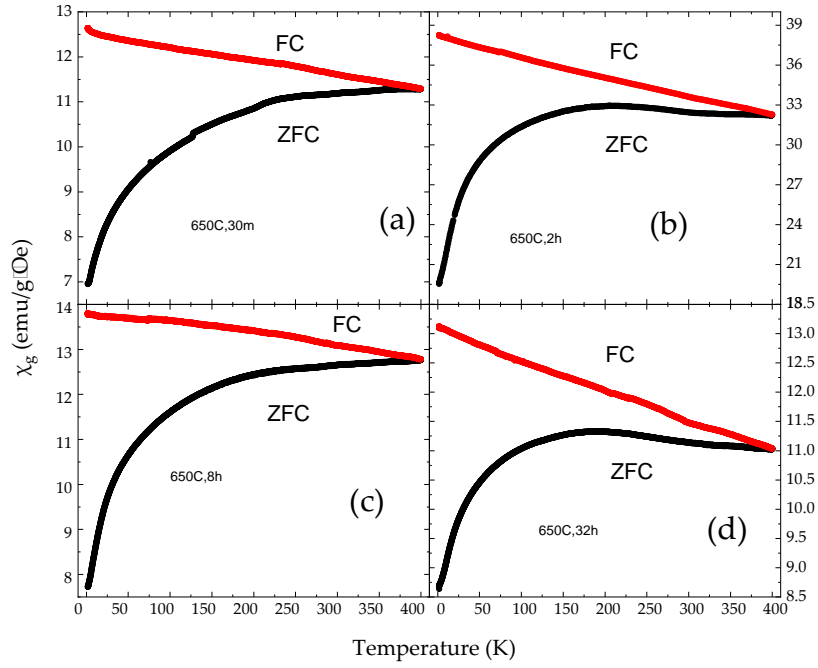

**Figure S15.**  $\chi_g$  vs. T measurements of the NHD-650,30m (a), NHD-650,2h (b), NHD-650,8h (c) and NHD-650,32h (d) samples under an applied field of 999 Oe.

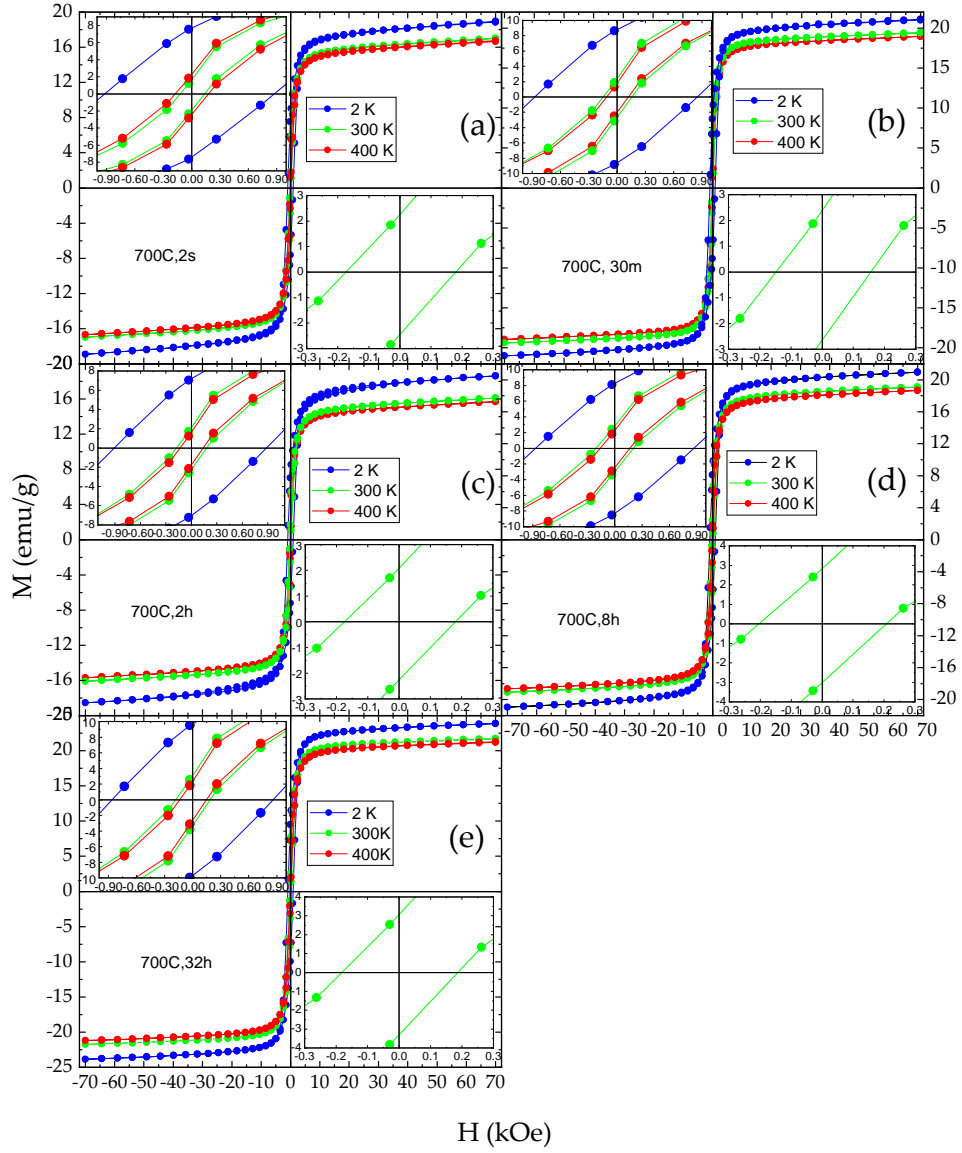

**Figure S16.** M vs. H isothermal loops of the NHD-700,2s (a), and NHD-700,30m (b), NHD-700,2h (c), NHD-700,8h (d) and NHD-700,32h (e) samples measured at different temperatures indicated by different colors. The insets in each set of measurements show the details of the loops' characteristics around zero H field for all temperatures (upper left) and with even more detail for the 300 K loop (lower right).



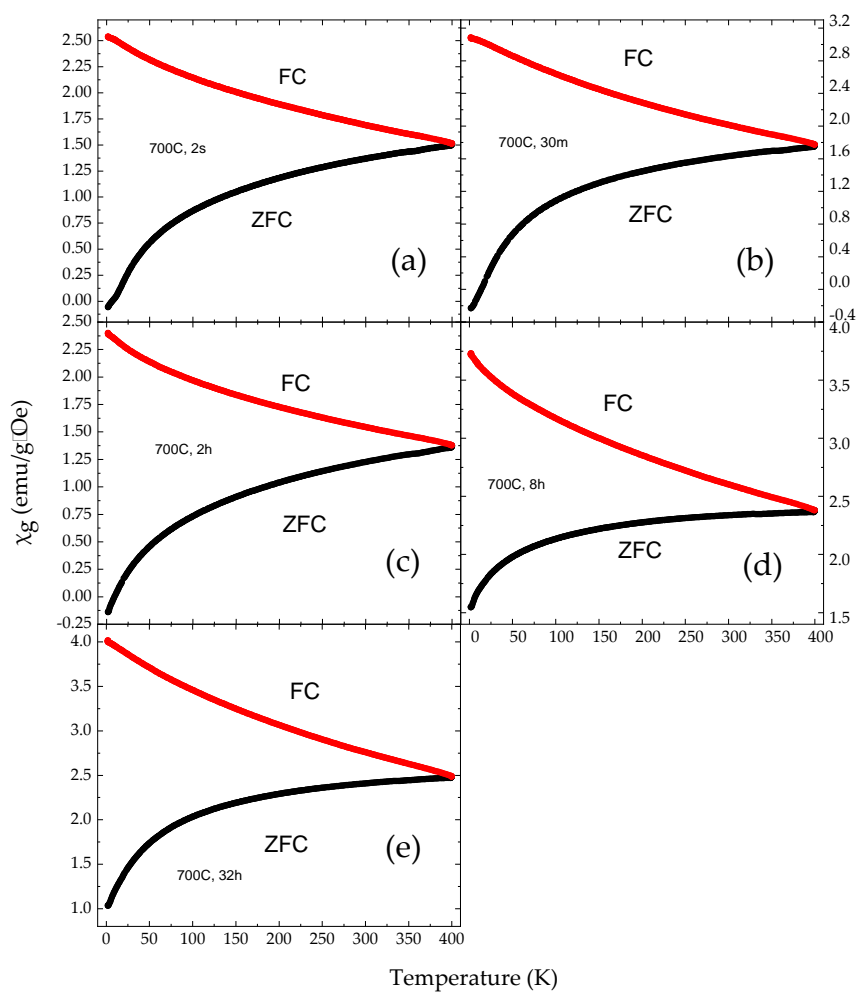

**Figure S17.**  $\chi_g$  vs. T measurements of the NHD-700,2s (a), and NHD-700,30m (b), NHD-700,2h (c), NHD-700,8h (d) and NHD-700,32h (e) samples under an applied field of 99 Oe.

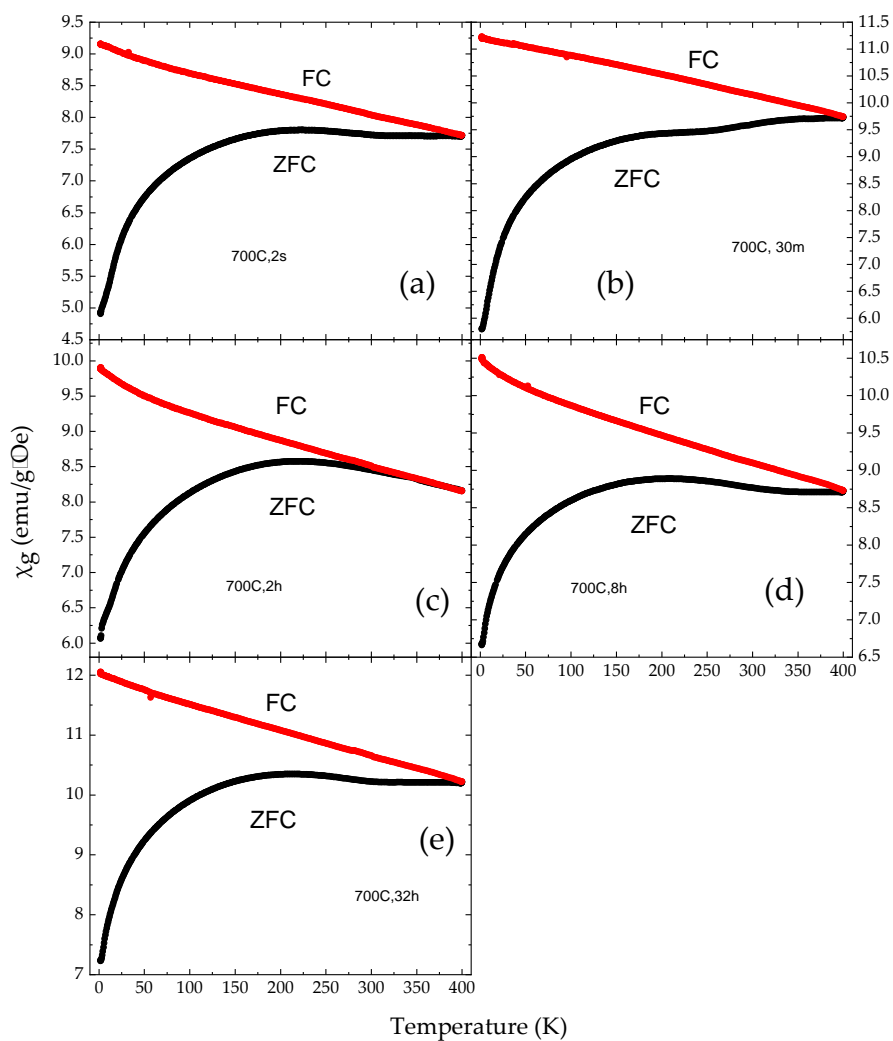

**Figure S18.**  $\chi_g$  vs. T measurements of the NHD-700,2s (a), and NHD-700,30m (b), NHD-700,2h (c), NHD-700,8h (d) and NHD-700,32h (e) samples under an applied field of 999 Oe.

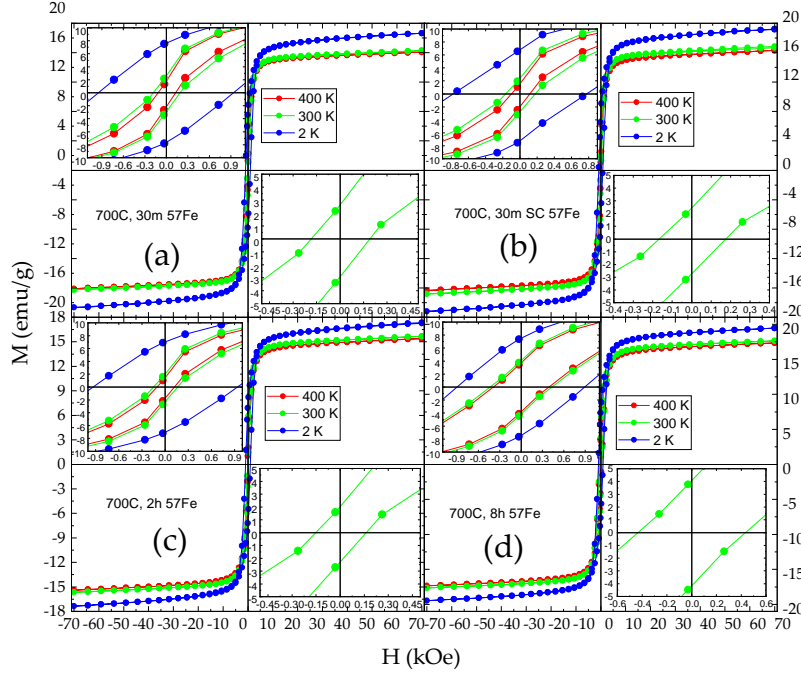

**Figure S19.**  $M$  vs.  $H$  isothermal loops of the  $^{57}\text{Fe}$  enriched En-NHD-700,30m (a), and En-NHD-700,30m-SC (b), En-NHD-700,2h (c) and En-NHD-700,8h (d) samples measured at different temperatures indicated by different colors. The insets in each set of measurements show the details of the loops' characteristics around zero  $H$  field for all temperatures (upper left) and with even more detail for the 300 K loop (lower right).

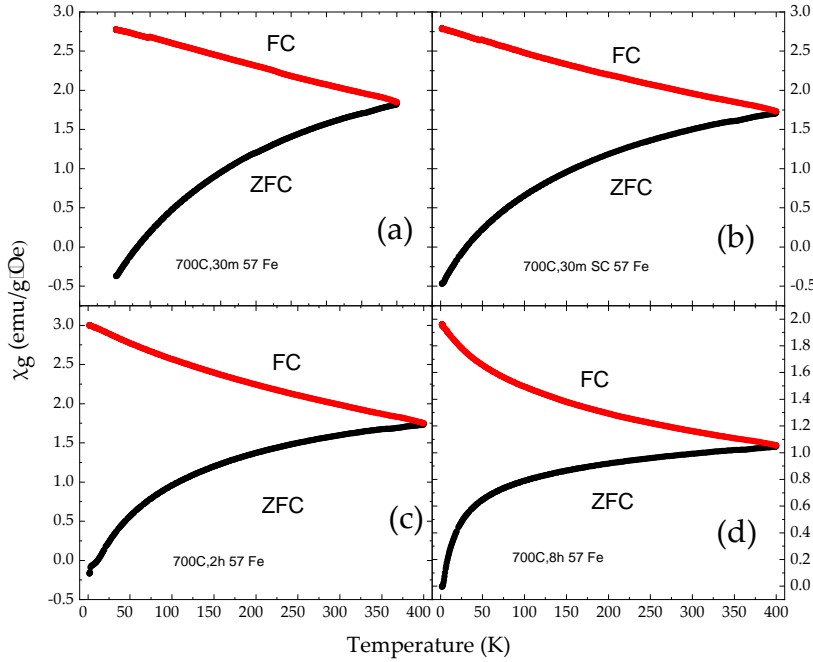

**Figure S20.**  $\chi_g$  vs.  $T$  measurements of the  $^{57}\text{Fe}$  enriched En-NHD-700,30m (a), and En-NHD-700,30m-SC (b), En-NHD-700,2h (c) and En-NHD-700,8h (d) samples under an applied field of 99 Oe.

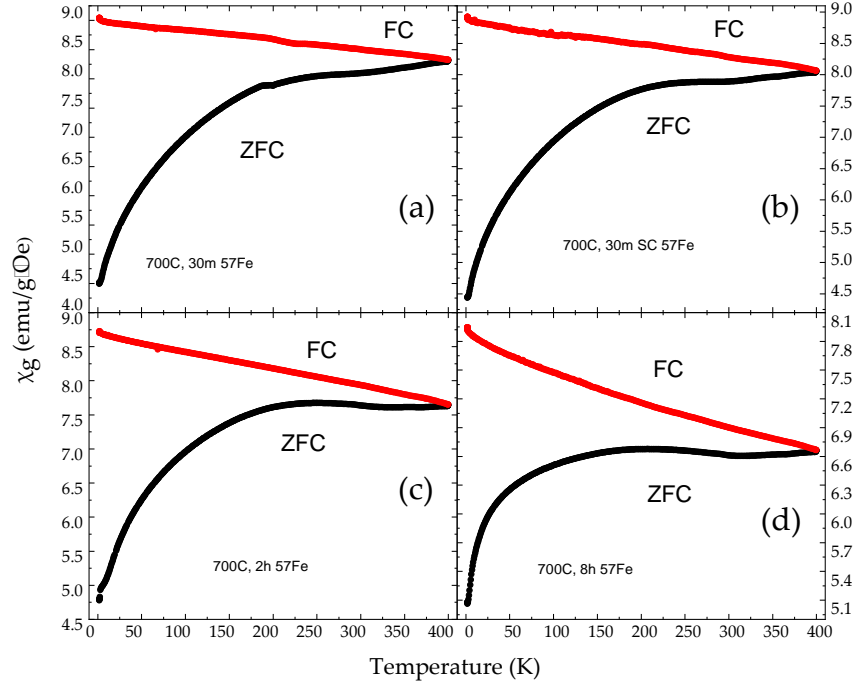

**Figure S21.**  $\chi_g$  vs. T measurements of the  $^{57}\text{Fe}$  enriched En-NHD-700,30m (a), and En-NHD-700,30m-SC (b), En-NHD-700,2h (c) and En-NHD-700,8h (d) samples under an applied field of 999 Oe.

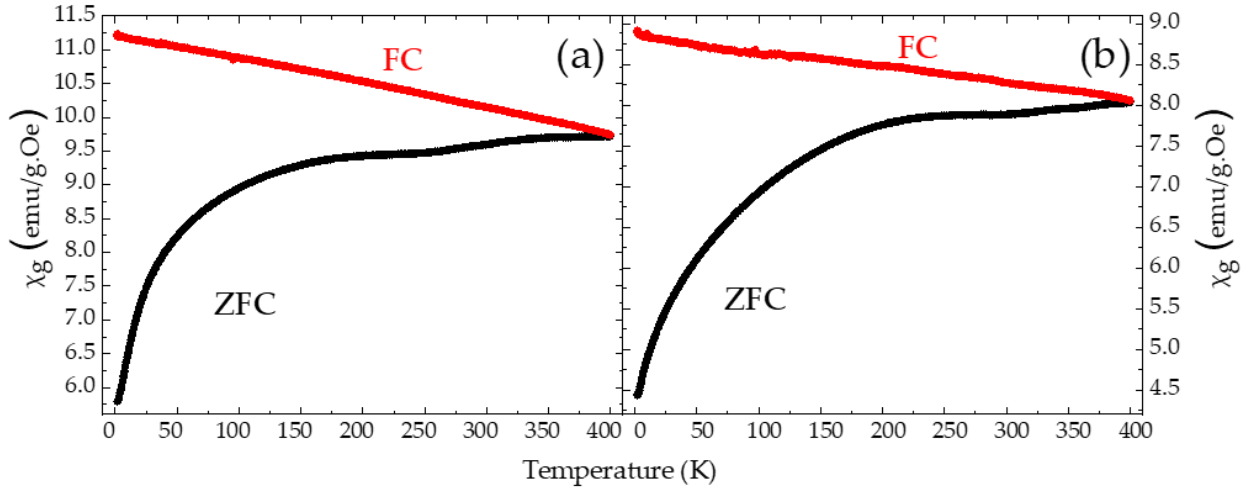

**Figure S22.**  $\chi_g$  vs. T measurements of the non-enriched NHD-700,30m (a) and  $^{57}\text{Fe}$  enriched En-NHD-700,30m\_SC (b) under an applied field of 999 Oe.

**Table S8.** Magnetic characteristics derived from the respective isothermal loops of all samples at 300 and 2 K.

| Sample      | T (K) | $M_{\text{max}+}$<br>(emu/g) | $M_{\text{max}-}$<br>(emu/g) | $M_{\text{R}+}$<br>(emu/g) | $M_{\text{R}-}$<br>(emu/g) | $H_{\text{C}+}$<br>(Oe) | $H_{\text{C}-}$ (Oe) |
|-------------|-------|------------------------------|------------------------------|----------------------------|----------------------------|-------------------------|----------------------|
| NHD-600,30m | 300   | 11.9                         | -11.9                        | 1.4                        | -1.6                       | 114                     | -119                 |
|             | 2     | 14                           | -13.9                        | 5.3                        | -5.3                       | 952                     | -986                 |
| NHD-600,2h  | 300   | 10.5                         | -10.6                        | 1.5                        | -1.6                       | 183                     | -168                 |
|             | 2     | 12.4                         | -12.4                        | 5                          | -5.1                       | 1221                    | -1208                |
|             | 300   | 13.1                         | -13.1                        | 2                          | -2.1                       | 198                     | -174                 |

|                   |     |      |       |     |      |      |       |
|-------------------|-----|------|-------|-----|------|------|-------|
| NHD-600,8h        | 2   | 15.2 | -15.2 | 6.2 | -6.3 | 1114 | -1114 |
| NHD-600,32h       | 300 | 17.2 | -17.2 | 2.2 | -2.3 | 140  | -130  |
|                   | 2   | 18.6 | -18.7 | 7.7 | -7.8 | 960  | -955  |
| NHD-650,30m       | 300 | 20.6 | -20.6 | 2.1 | -3.9 | 167  | -138  |
|                   | 2   | 22.9 | -22.9 | 7   | -7.8 | 749  | -729  |
| NHD-650,2h        | 300 | 18.7 | -18.7 | 2.2 | -2.6 | 160  | -145  |
|                   | 2   | 20.7 | -20.7 | 8.6 | -8.5 | 895  | -895  |
| NHD-650,8h        | 300 | 23.8 | -23.8 | 0.8 | -3.4 | 106  | -20   |
|                   | 2   | 25.1 | -25.1 | 6.4 | -8.3 | 265  | -271  |
| NHD-650,32h       | 300 | 21.8 | -21.9 | 2.8 | -3.3 | 162  | -154  |
|                   | 2   | 23.6 | -23.8 | 9.5 | -9.6 | 768  | -756  |
| NHD-700,2s        | 300 | 17   | -17   | 1.6 | -1.9 | 140  | -120  |
|                   | 2   | 18.9 | -18.9 | 7.7 | -7.4 | 880  | -921  |
| NHD-700,30m       | 300 | 19.4 | -19.4 | 2.3 | -2.7 | 160  | -152  |
|                   | 2   | 21.1 | -21.1 | 8.7 | -8.6 | 856  | -881  |
| NHD-700,2h        | 300 | 16   | -16.1 | 2.1 | -2.2 | 177  | -181  |
|                   | 2   | 18.6 | -18.5 | 7.2 | -7.1 | 892  | -903  |
| NHD-700,8h        | 300 | 19.1 | -19.2 | 2.8 | -3.2 | 216  | -206  |
|                   | 2   | 20.9 | -20.9 | 8.3 | -8.3 | 872  | -869  |
| NHD-700,32h       | 300 | 21.7 | -21.8 | 3.1 | -3.6 | 191  | -182  |
|                   | 2   | 23.8 | -23.9 | 9.7 | -9.8 | 866  | -857  |
| En-NHD-700,30m    | 300 | 16.3 | -16.2 | 2.6 | -2.9 | 205  | -180  |
|                   | 2   | 18.6 | -18.6 | 7.7 | -7.6 | 940  | -947  |
| En-NHD-700,30m-SC | 300 | 16.7 | -16.8 | 2.5 | -2.7 | 177  | -169  |
|                   | 2   | 19.2 | -19.2 | 6.8 | -7.2 | 781  | -776  |
| En-NHD-700,2h     | 300 | 15.7 | -15.6 | 2.1 | -2.3 | 168  | -148  |
|                   | 2   | 17.3 | -17.4 | 7.1 | -7   | 945  | -932  |
| En-NHD-700,8h     | 300 | 17.7 | -17.7 | 4.1 | -4.2 | 442  | -432  |
|                   | 2   | 19.4 | -19.5 | 7.5 | -7.4 | 897  | -897  |
